# Supplementary material
Source: Springer Nature journal article supplement (https://www.springermedizin.de/resource/supplementary/13063_2012_1063_MOESM2_ESM.pdf/9619426)
Supplement: MOESM2 [file 9619426]

|  |                                                              | Screening | Pre-randomisation      | <12 hours | Day 1 -5 | Day 5 (+/ -2) | Day 14 * | Day 90 | Day 180 | Day 360 |
|--|--------------------------------------------------------------|-----------|------------------------|-----------|----------|---------------|----------|--------|---------|---------|
|  | Diagnostic CT                                                | X         |                        |           |          |               |          |        |         |         |
|  | INR                                                          | X         |                        |           |          |               |          |        |         |         |
|  | Informed consent                                             |           | X                      |           |          |               |          |        |         |         |
|  | Baseline data                                                |           | X                      |           |          |               |          |        |         |         |
|  | Surgery (if randomised to early surgery)                     |           |                        | X         |          |               |          |        |         |         |
|  | ICP (if monitored)                                           |           |                        |           | X        |               |          |        |         |         |
|  | GCS/Focal signs                                              |           |                        |           | X        |               |          |        |         |         |
|  | CT scan                                                      |           |                        |           |          | X             |          |        |         |         |
|  | Hospital data                                                |           |                        |           |          |               | X        |        |         |         |
|  | GOS                                                          |           |                        |           |          |               | X        |        | X       | X       |
|  | Rankin                                                       |           |                        |           |          |               |          |        | X       | X       |
|  | EQ-5D                                                        |           |                        |           |          |               |          | X      | X       | X       |
|  | Carer Activities (UK only)                                   |           |                        |           |          |               |          | X      | X       | X       |
|  | Resource Use (UK only)                                       |           |                        |           |          |               |          | X      | X       | X       |
|  | * 14 days or at death or discharge whichever occurs earliest |           |                        |           |          |               |          |        |         |         |
|  |                                                              |           | UK only                |           |          |               |          |        |         |         |
|  |                                                              |           | Surgical group only    |           |          |               |          |        |         |         |
|  |                                                              |           | ICP monitored subgroup |           |          |               |          |        |         |         |
